## **A tool for the *in vivo* gating of gene expression in neurons using the co-occurrence of neural activity and light**

Adam T. Vogel <sup>\*1,2</sup> and Shelley J. Russek <sup>1,2,3,4</sup>

1) Graduate Program for Neuroscience, Boston University; 2) Center for Systems Neuroscience, Boston University, Boston, Massachusetts, U.S.A; 3) Departments of Pharmacology & Experimental Therapeutics, and Biology, Boston University, Boston, Massachusetts, U.S.A.; 4) Laboratory of Translational Epilepsy, Boston University School of Medicine, U.S.A.

Running Title: Genetic expression system for coincidence detection of light and intranuclear calcium

\*Corresponding Author: Adam T. Vogel

Email: [atvogel@bu.edu](mailto:atvogel@bu.edu)

Number of text pages: XX

Number of figures: 3

### Acknowledgements:

We would like to acknowledge the mentorship and support of the Michael Hasselmo laboratory during the course of this technology development and the members of the Russek and Hasselmo laboratories, with especial thanks to Sabita Bandyopadhyay, Zhuting Li, and Kathryn Hixson.

This work was supported by NINDS 5R01NS051710-14 and the BU Provost award for collaborative neuroscience research.

## Abstract

Advancements in genetically based technologies have begun to allow us to better understand the relationships between underlying neural activity and the patterns of measurable behavior that can be reproducibly studied in the laboratory. As this field develops, there are key limitations to the currently available technologies hindering their full potential to deliver meaningful datasets. The limitations which are most critical to advancement of these technologies in behavioral neuroscience are: the temporal resolution at which physiological events can be windowed, the divergent molecular pathways in signal transduction that introduce ambiguity into the output of activity sensors, and the impractical size of the genetic material that requires 3-4 separate AAV vectors to deliver a fully functional system into a cell. To address these limitations and help bring the potential of these types of technologies into better realization, we have engineered a nucleus localized light-sensitive  $\text{Ca}^{2+}$ -dependent gene expression system based on AsLOV<sub>2</sub> and the downstream responsive element antagonist modulator (DREAM). The design and engineering of each component was performed in such a way to: 1) preserve behaviorally relevant temporal dynamics, 2) preserve signal fidelity appropriate for studying experience-driven neural activity patterns and their relationship to specific animal responses, and 3) have full delivery of the genetic material via a single AAV vector. The system was tested *in vitro* and subsequently *in vivo* with neural activity induced by Channelrhodopsin and could be used in the future with behaviorally-driven neural activity. To our knowledge this is the first optogenetic tool for the practical use of linking activity-dependent gene activation in response to direct nuclear calcium transduction.

## Main

Neuroscientists have been developing a wide range of new tools to study the patterns of neural activity underlying behavior. For example, advances in optics and intracellular calcium ( $\text{Ca}^{2+}$ ) indicators have allowed for simultaneous stimulation and observation of individual neurons within animals<sup>1-3</sup>. In parallel, a wave of new genetically encoded tools has further advanced our ability to monitor and perturb neural activity<sup>4-8</sup>. Though these technological advancements are promising, they are limited in accessibility and application to the field of neuroscience as a whole. The cost, both in terms of finance and human resources, of new optical microscopic systems is a barrier that many labs are unable to overcome. A solution to this problem may lie in recently developed genetically engineered tools which do not require large optical configurations to modulate and interact with.

Genetic technologies have often relied on pharmacological agents for temporal specificity. Due to slow pharmacological dynamics and long half-life, the temporal resolution at which pharmacologically based tools can window activity-dependent gene transcription severely limits their use in behavioral research. Recently, tools have been developed to enable researchers to gate gene expression in neurons by dynamic changes in the concentrations of calcium ( $\text{Ca}^{2+}$ ) within the cell bodies of individual neurons, known as cytosolic  $\text{Ca}^{2+}$ <sup>9,10</sup>. While localized transduction of cytosolic  $\text{Ca}^{2+}$  can be used as a biomarker of long-term cellular changes in individual neurons, the inherent ambiguity of divergent cytosolic  $\text{Ca}^{2+}$ -signaling pathways and their relationship to extracellular signaling greatly limits our ability to interpret the meaning behind them<sup>11-15</sup>. For example, it is unclear if a given  $\text{Ca}^{2+}$  signal is due to a subthreshold oscillation, a train of action potentials, or release of an intracellular  $\text{Ca}^{2+}$  store<sup>12,16-20</sup>. Additionally, these technologies are composed in large genetic encodings which greatly hinders

their practical use in *in vivo* behavioral experiments. To be effective, such technologies will need to possess key characteristics including: (i) behaviorally relevant temporal dynamics of its gating mechanisms, (ii) minimal cross-reaction with other cellular molecules, and (iii) ease of use in a variety of organisms. We are particularly interested in detecting calcium signals that regulate activity-dependent gene expression important for learning and memory, as well as for the propagation of hyperactivity of neurons that occurs during epileptogenesis and neurodegeneration.

Several studies have shown nuclear  $\text{Ca}^{2+}$  transients evoked by experience-driven synaptic activity to be distinct events representing the propagation of information mediated by action potentials<sup>21–26</sup>. We set out to make a tool that would detect such  $\text{Ca}^{2+}$  transients using a genetic readout relevant to endogenous activity-dependent gene regulation. This tool, called CLiCK ( $\text{Ca}^{2+}$  Light Coincidence Knock<sub>in/out</sub>), is a dual condition genetic expression system. In neurons, CLiCK acts as a coincidence detector for the co-occurrence of neural activity (as monitored by the presence of transient nuclear  $\text{Ca}^{2+}$ ) and blue light (~450 nm). Transcription occurs only through the simultaneous release of both gating mechanisms. Neither light nor activity alone are sufficient to induce reporter gene expression. We demonstrate high temporal responsiveness of CLiCK *in vivo*, enabling subsecond windowing of behaviorally-driven neural activation, in contrast to pharmacological windows that last many hours. To eliminate failures due to incomplete delivery of transgenes using multiple viral vectors, we engineered the entirety of CLiCK into a single multicistronic unit < 2.5 KB; small enough to deliver via a single AAV vector and containing a transcriptional marker (ZsGreen) for vector detection.

The photo-switch in CLiCK comes from the light-oxygen-voltage (LOV) sensitive domain from *Avena sativa* (AsLOV<sub>2</sub>)<sup>27,28</sup>. The C-terminus of native AsLOV<sub>2</sub> contains a photo-





To identify ADs suitable for caging within AsLOV<sub>2</sub>, we searched for candidates that were biochemically similar to the J $\alpha$ -helix and two transactivator peptides were chosen: the virion protein 16 of herpes simplex virus type 1 (VP16) and the lymphocyte-derived octamer transcription factor 2A (Oct). The amphipathic  $\alpha$ -helix of VP16 contains a minimal activation motif (VP16<sub>437-447</sub>) DALDDFDLML capable of inducing expression in either proximal or remote locations<sup>32</sup>. VP16<sub>437-447</sub> negative residues D443 and D445 are critical for initial docking interactions while hydrophobic residues L439, F442, and L444 are critical for stable transcriptional activity with residue F442 particularly critical<sup>33</sup>. The Oct minimal activation motif (Oct<sub>143-160</sub>) NLFQLPQQTQGALLTSQP induces proximal transcriptional activation<sup>32,34</sup>. As mutations deep inside the J $\alpha$ -helix are more likely to disrupt adduction into the  $\beta$ -sheets of AsLOV<sub>2</sub>, we designed preliminary J $\alpha$ -AD permutations which focused towards the outer segment of the J $\alpha$ -helix. Those permutations conserved hydrophobic residues I539, A542, and A543 known to make critical contacts with AsLOV<sub>2</sub> domain  $\beta$ -sheets<sup>35,36</sup>.

The I-TASSER protein modeling suite<sup>37</sup> was used to construct high quality models to identify favorable J $\alpha$ -AD chimeric sequences (**Fig. 1b**). For each chimeric sequence an average of 9,869 simulations was performed, generating a large ensemble of structural conformations from which five full length atomic models were constructed. Structural and functional analyses were performed using the models with the greatest confidence score. Impacts of AsLOV<sub>2</sub>-J $\alpha$  alterations on stability of J $\alpha$ -AD segments, particularly along key hydrophobic residues, were evaluated for impact on gating integrity (**Fig. 1c**). General stability of J $\alpha$ -ADs was determined by averaging predicted inherent thermal mobility (B-factor) of its residues. Additionally, solvent accessibility of individual residues along J $\alpha$ -ADs was examined to determine if particular residues packed favorably against the protein core. Finally, to assess for any fundamental









occurrence of activity and light (active-light) was examined by the simultaneous application of KCl and light protocols. To temporally define the window of activity upon exposure to light, culture media was immediately exchanged with TTX (1  $\mu$ M) conditioned media following all KCl washes. Immediately following all conditions, cells were returned to light-tight containers and incubated for 6 hrs before imaging. With relief of both  $\text{Ca}^{2+}$  and light gates, mRuby<sub>2</sub> expression increased by 19-fold compared to expression in the absence of activity and light (**Fig. 3d**). When both gates are engaged, we observed minimal expression (transcriptional leakage) of mRuby<sub>2</sub> (mean of 3.9%). With the release of either gate, leak increased slightly where 5.8% is observed through the  $\text{Ca}^{2+}$  gate and 12.9% through the light gate. Though transcriptional leakage is more prominent in active cells under dark conditions, it is comparable to baseline observed in HEK cells (**Fig. 1g**).



To prepare CLiCK for practical use in experimental settings, the entirety of CLiCK (< 2.5 KB) was engineered into a single multicistronic AAV vector (**Fig. 3e**) leaving, minimally, 2.3 KB for insertion of a conditional transgene. In its concise form, CLiCK contains two expression cassettes: (1) CLiCK<sub>act</sub> and (2) CLiCK<sub>tf</sub>. The promoter region of CLiCK<sub>act</sub> contains an iDRE binding sequence 51 bp downstream of a 5xUAS sequence and 24 bp upstream from the Kozak sequence recognized by the ribosome. Conditional transgenes can be easily inserted in-frame via AgeI and NotI restriction sites. CLiCK<sub>tf</sub> contains genes that encode a transduction marker (ZsGreen) and the photo-switchable transcription factor CLiCK<sub>tf</sub>, separated by a P2A self cleaving peptide sequence. The CLiCK<sub>tf</sub> gene was placed downstream of the P2A to avoid addition of undesired residues left behind by cleavage. To enhance stable transcription termination and avoid conditional expression leaks arising from runoff transcription, CLiCK<sub>act</sub> was placed upstream of CLiCK<sub>tf</sub> and a pause sequence (Tact and sMAP8, respectively) was inserted near the end of each expression cassette<sup>51</sup>. Expression variability through unintended enhancer activity or position effects of transgenes, was minimized using an insulator sequence (cHS4) inserted between expression cassettes. Changes in mRuby<sub>2</sub> expression under positive conditions were evaluated in HEK cells using a Gal4-VP16 transcription factor (**Fig. 1g**). For negative controls, the VP16 activation domain was removed such that only the Gal4 DNA binding domain remained (**see Methods for details**). Compared to delivery of CLiCK via multiple vectors, we found positive expression of mRuby<sub>2</sub> under a single multicistronic vector increased by 28%, indicating improved delivery of the complete package of transgenes (**Fig. 3f**).

Most importantly, the potential *in vivo* application of CLiCK was tested using Thy1-ChR2-YFP mice (n = 5) (Jackson Labs; B6.Cg-Tg(Thy1-ChR2/EYFP)18Gfng/J), a mouse line that has been engineered to express channel rhodopsin 2 under control of the thymus antigen 1

(Thy1) promoter. The caudal forelimb area (CFA) of the mouse motor cortex was bilaterally injected with a recombinant AAV containing CLiCK (**Fig. 3g**). A fiber optic targeting the CFA was unilaterally implanted in the left hemisphere of each mouse such that photo-activation of the left CFA would produce displacement of the right forelimb. The right hemisphere was treated as a dark control. Following 3 weeks post-surgery, mice were placed in an open field (91 x 91 cm) and a brief photo-stimulation protocol was implemented (**for details see Methods**). For photo-induction, a 473 nm light was used which activates both ChR2 and CLiCK's photo-switchable transcription factor. A light pulse of 10 Hz (100 ms period) was delivered at 50% duty cycle (50 ms ON, 50 ms OFF) for one second. In total, 50 light pulses (5 sec interpulse interval) were delivered per mouse. Sessions lasted a total of 5 mins. Following photo-stimulation, mice were returned to their home cage for 8 hrs then perfused for imaging analysis. On average, photo-stimulation of the left CFA induced an observable right forelimb displacement for 83% of the light pulses delivered in a session (**Fig. 3h**). Without photo-stimulation, free mobility of the forelimbs in open field exploration produced < 5% expression leak of mRuby<sub>2</sub> in CFA cells (n = 1120 cells/5 mice) (**Fig. 3i**). With the co-occurrence of light and forelimb activity, there was a 13-fold increase of mRuby<sub>2</sub> expression in the CFA (n = 1479 cells/4 mice).

We have identified and addressed three crucial characteristics currently limiting the potential of current technologies. These include a (i) poor temporal resolution in the temporal windowing of signal (activity) -dependent gene transcription, (ii) signal ambiguity through divergent signal transduction pathways, and (iii) impractically complex packaging of genetic material. Collectively, these limitations present a very real barrier between the application and potential of optogenetic tools.

To address limitations in the temporal resolution of physiologically conditioned (activity-dependent) gene transcription we engineered a light-sensitive transcription factor which minimizes both the number of molecular events and physical distance between the site of light transduction and the site of gene transcription to within the nucleus of the cell. To dispel ambiguity in the signal transduction of neural activity we incorporated a direct nuclear Ca<sup>2+</sup>-modulated repressor upstream of our reporter gene. Finally, through concise genetic design and encoding we are able to package and deliver the entirety of our system within a single AAV vector, thus overcoming practical barriers in its application *in vivo*. Together, these features offer a potential platform technology for the practical application in studies of neural activity patterns.

In our *in vivo* proof of concept study, we used light to drive both neural activity (via channelrhodopsin) and the unfolding of CLiCK's light-sensitive transcription factor. This allowed us to link a behavioral readout (displaced limb movements) to anatomically specific expression of mRuby<sub>2</sub> in the CFA of M1. With the combined vector, we observed that transcription of the reporter mRuby<sub>2</sub> corresponded with a decreased expression of the transduction marker, ZsGreen (**Fig. 3j**). This may be due to a competition in the molecular co-factors required for transcription of nearby genes, especially with increased activation of one promoter, or epigenetic modification of the CMV promoter driving the transduction marker. When we delivered CLiCK via two vectors (3b top) we observed continuous expression of both the ZsGreen and mRuby<sub>2</sub> with the co-occurrence of light and KCl induced Ca<sup>2+</sup> (3d).

As this technology continues to be developed, I am particularly interested in exploring its applications in translational and clinical neuroscience to address unmet medical needs in mental health conditions. I believe there are several points along the development of a therapeutic candidate which precise experimental control of activity-dependent gene transcription would be

useful, if not groundbreaking. These include, but not limited to, the development of new neurocircuit-based animal disease models, behaviorally relevant (functional) transcriptomics, and behaviorally-targeted delivery of new gene therapy candidates.

## Methods

### *In Silico Modeling*

To construct high-quality predictions of 3D protein structure and function from amino acid sequences an *Iterative Threading ASSEmby Refinement* (I-TASSER) algorithm was adopted. The I-TASSER algorithm consists of 3 consecutive steps of threading, fragment assembly, and iteration<sup>52-54</sup>. 3D models were visualized and plotted using the Python package for molecular visualization, PyMOL.

### *Molecular Cloning*

*Photo-switchable chimerics:* To create the functional domains (DNA binding domain (Gal4), photo-sensitive core (AsLOV<sub>2</sub>), and transcription activation domain (AD) of CLiCK<sub>tf</sub>, we incorporated and synthesized DNA fragments from multiple sources. For the light sensitive core of the CLiCK<sub>tf</sub>, the LOV protein was used in combination with other elements. The expression construct for *Avena sativa* phot1 LOV2 (Uniport O49003\_AVESA) was generously provided by Dr. Andreas Möglich (Humboldt University of Berlin) in a ET-28c plasmid. The Gal4 DNA binding domain and UAS promoter sequence was generously provided by Dr. Ben Wolozin (Boston University) in a pCI-neo plasmid. Single-stranded NLS and Jα-activation domain oligonucleotides were synthesized using Integrated DNA Technologies custom DNA service. Oligos ≤ 60 nucleotides were purified using standard desalting purification while oligos > 60 nucleotides were purified using PAGE. Oligos were resuspended in nucleus-free buffer and annealed at equal molar concentrations. For in-frame cloning of Jα-activation domains into the N-terminus of AsLOV<sub>2</sub>, overlap extension PCR<sup>55</sup> was used. AsLOV-Jα-AD PCR products were then cloned in-frame into pGal4-CI backbones using standard digest and ligation protocols. For Gal4-Jα-AD constructs, double stranded Jα-AD oligos were used to clone into the pGal4-CI.





performed using primary neuronal cultures at 7 DIV, using the NeuroMag Magnetofection™ kit (Oz Biosciences #KC30800). Plasmid DNA was diluted in NBM and added to the NeuroMag Transfection Reagent. The DNA solution was incubated (20 minutes, room temperature) before being added to neuronal culture dishes and incubated on a magnetic plate (20 min, room temperature) provided with the kit. Cells were removed from the plate and incubated (37°C, 5% CO<sub>2</sub>) for 10-14 days before assaying.

### ***Cell Assays***

*Photo-switchable cell assay.* To induce light-dependent transcription, cells were briefly exposed to 1 second pulses of blue light (450 nm peak, 12 mW). Following photo-stimulation, cells were immediately returned to light-tight containers and placed into a cell incubator for 6-8 hours prior to imaging. All light sensitive experiments were carried out in a light-controlled environment.

*KCl induced neuronal activity assay.* For activity-dependent transcription conditions, intranuclear Ca<sup>2+</sup> transients were induced by applying 20 mM of KCl to neuronal culture media and rapidly washed out using neuronal culture media drawn from the sample 3-7 days prior to assaying. Following KCl washes, cells were returned to the incubator for 6-8 hours before imaging. To suppress transcription through spontaneous neural activity in negative control conditions, 1 μM of TTX was add to the culture media 6-8 hours prior to imaging.

*Photo-switchable activity-dependent assay.* KCl induced-activity and light assay designs were combined and coincidence gating of the fluorescent reporter mRuby<sub>2</sub> in primary neuron cultures was examined under four conditions: inactive-dark, inactive-light, active-dark, and active-light. To evaluate leakage of mRuby<sub>2</sub> expression in the co-absence of both iCa<sup>2+</sup> and light

(inactive-dark), cells were kept in light-tight containers and treated with 1  $\mu\text{M}$  of TTX to suppress spontaneous neural activity. Independent leak of expression through each gate was examined by individually applying either the  $i\text{Ca}^{2+}$  or light assay (previously described above) with the supplemental treatment of 1  $\mu\text{M}$  TTX to culture media to block spontaneous neural activity in the light-alone assay. For co-occurrence of  $i\text{Ca}^{2+}$  and light (active-light), simultaneous application of KCl and light protocols was performed. Culture media was immediately exchanged with 1  $\mu\text{M}$  TTX preconditioned media following all KCl washes to create a temporally windowed period of KCl-induced neural activity. Immediately following all light-sensitive conditions, cells were returned to light-tight containers and incubated for 6-8 hrs before imaging.

### ***In Vitro Image Acquisition, Processing, and Analysis***

*Image Acquisition.* Fluorescent images were collected on an Olympus inverted fluorescence microscope at 10X and 20X using a mercury bulb for excitation of fluorophores. ZsGreen was excited at 470/40 nm (center wavelength/bandwidth) and emissions were collected at 525/50 nm, emission (495 nm dichroic mirror). eYFP was excited at 500/20 nm and emissions were collected at 535/30 nm, emission (515 nm dichroic mirror). mRuby2 was excited at 560/40 nm and emissions were collected at 630/60 nm, emission (585 nm dichroic mirror).

*Image Processing and Analysis.* Automated cell counts were performed in ImageJ using a custom written script. Briefly, images were first convolved with a Gaussian filter with a standard deviation of 2. To avoid erroneous segmentation of non-fluorescent images, background subtractions were performed on images with an intensity distribution kurtosis  $> 0.4$  using the Subtract background plugin with a rollsize radius =  $0.05\sqrt{W \times H}$  pixels, where  $W$  = image width

and  $H$  = image height. Additionally, to automate appropriate thresholding for segmentation, images with an intensity distribution kurtosis  $> 0.4$  were checked for in mean/median ratio  $\geq 1$  and skewness  $> 0.1$ . For images meeting all three criteria, the Triangle<sup>56</sup> threshold was used, otherwise, the Moments<sup>57</sup> threshold was used. Next, binary masks were created from thresholds and an erosion and dilation was performed on masks followed by a Watershed segmentation. Particles with an area greater than  $4\sqrt{W \times H}$  pixels squared were the counted using the Analyze Particles plugin.

### ***Mice***

For rapid photo-induced motor behavior, experiments were performed using a transgenic mouse line that expresses the light-activated ion channel, Channelrhodopsin-2, fused to Yellow Fluorescent Protein, in layer 5 cortical neurons under control of the mouse thymus cell antigen 1 (Thy1) promoter (B6.Cg-Tg(Thy1-ChR2/EYFP)18Gfng/J, Jackson Labs). Male and female mice (2-4 months old) were housed by gender in Plexiglas cages together with their siblings before surgery, but separated for individual housing after surgery, and maintained on a 12 h light/dark cycle. Food and water was provided *ad libitum* throughout the duration of housing.

### ***Stereotactic Surgeries***

*General surgical procedure.* All procedures were done in accordance with the Boston University Institutional Animal Care and Use Committee. Surgeries were performed to inject virus containing the CLiCK construct. Viral packaging of CLiCK was performed at Boston Children's Hospital Viral Core. In preparation for surgery, animals were given an injection of atropine (10 mg/kg IP) and buprenorphine (0.1 mg/kg IP) and anesthetized with isoflurane (3%



induced limb displacement during laser stimulation was defined by the co-occurrence of the photo-stimulation and rapid pulsing displacement of the right forelimb due to activation of the left motor cortex.

*Photo-stimulation.* For simultaneous laser stimulation of ChR2 and CLiCK<sub>tf</sub> in mice, a fiber-coupled 473 nm laser (OBIS FP, Coherent), was digitally modulated via the TTL channel with an Arduino Due microcontroller using a custom built script (see Appendix 2). Laser light was delivered into the brain via a system of fiber patch cords (Thorlabs) and a rotary joint (FRJ\_11\_FC-FC, Doric Lenses). The last connection was a magnetic connection to the implanted light fiber. The laser light power entering the implanted light fiber was measured before and after every recording session and adjusted before the recording session to yield an estimate of 9.6 mW laser power delivered into the CFA. Laser stimulation was delivered at 10 Hz (100 ms period) with a 50% duty cycle (50 ms ON, 50 ms OFF) for one second with 5 s interpulse intervals (a typical session lasted 300 s with 51 Laser OFF and 50 Laser ON periods).

### *Histology*

Following photo-stimulation, mice were returned to their home cage for 8 h. Mice were then deeply anesthetized by isoflurane or intraperitoneal injection of Euthazol (390 mg/kg), and subsequent transcardial perfusion with saline followed by 10% buffered formalin (SF100-4, ThermoFisher Scientific). Brains were extracted and post-fixed in formalin for 2-4 more days after which they were placed in a 30% sucrose solution in KPBS for 1-2 additional days. The brains were then frozen and sliced on a cryostat (Leica CM 3050S) in 40 µm sections after which they were mounted and coverslipped with Vectashield Hardset mounting medium (Vector Laboratories). Slices were then imaged at 4x, 10x, and 20x on a Nikon Eclipse Ni-E

epifluorescence microscope to verify proper placement of the fiber optic fibers above the CFA of the motor cortex.

### ***In Vivo Image Acquisition, Processing, and Analysis***

*Image Acquisition in Post-Mortem Tissue After In Vivo Photo-Activation.* The effect of in vivo activation on the expression of fluorescence protein was analyzed with post-mortem imaging of the histological preparations of the tissue. Fluorescent images of the prepared tissue were collected on a Nikon Exclipse Ni-E epifluorescence microscope at 10X (Plan Fluor 10x NA 0.3) and 20X (Plan Apo Lambda 20x NA 0.75) using a Sola Light Engine for excitation of fluorophores. ZsGreen was excited at 470/40 nm (peak/bandwidth) and emissions were collected at 525/50 nm, emission (495 nm dichroic mirror). eYFP was excited at 500/20 nm and emissions were collected at 535/30 nm, emission (515 nm dichroic mirror). mRuby<sub>2</sub> was excited at 560/40 nm and emissions were collected at 630/60 nm, emission (585 nm dichroic mirror).

*Image Processing and Analysis of post-mortem histological preparations.* Automated cell counts of fluorescence labelled cells from histological preparation were performed in ImageJ using a custom written script (see Appendix 1) as described in the Methods section
